# Supplementary material for: Hydrolytic synthesis and structural characterization of lanthanide-acetylacetonato/hydroxo cluster complexes – A systematic study
Source: Royal Society of Chemistry journal article supplement (doi:10.1039/c0dt01218a), 2010-12-14
Supplement: c0dt01218a.pdf [file c0dt01218a.pdf]

## Supplemental Figures with a Labeling Scheme and ORTEP Ellipsoids (probability level 30%)

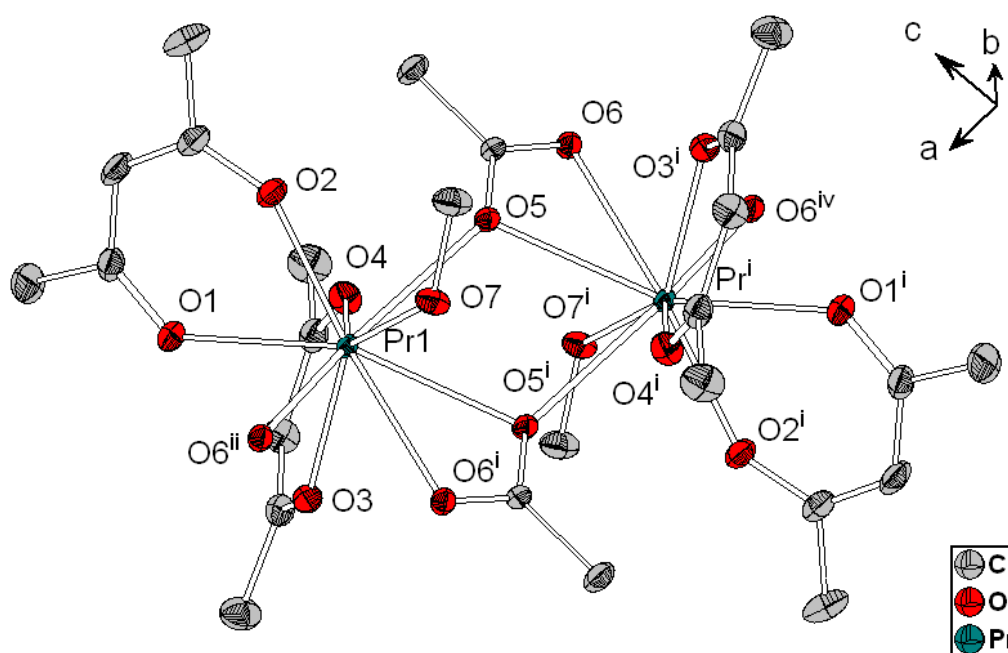

**Compound 1 (Symmetry operation:**  
**a**  $-x+1, -y, -z+1$  **b**  $x-1, y, z$  **c**  $x+1, y, z$ )

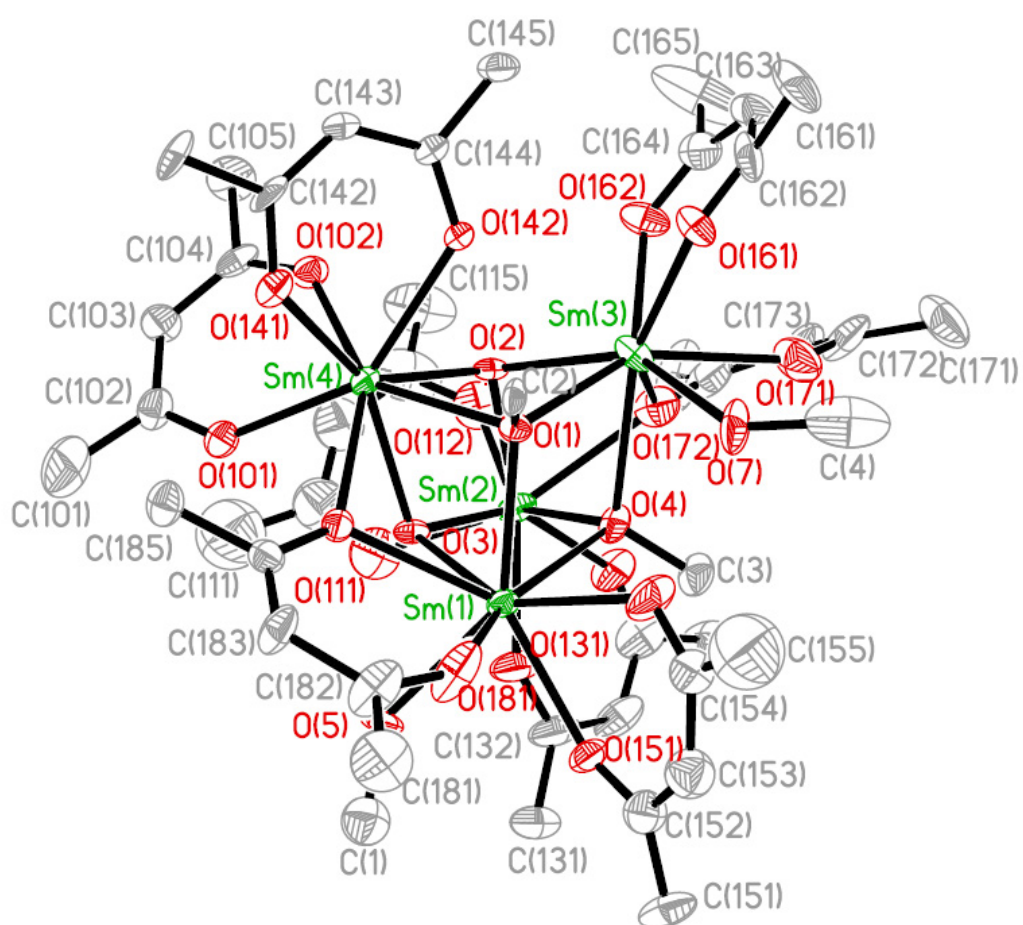

**Compound 2**

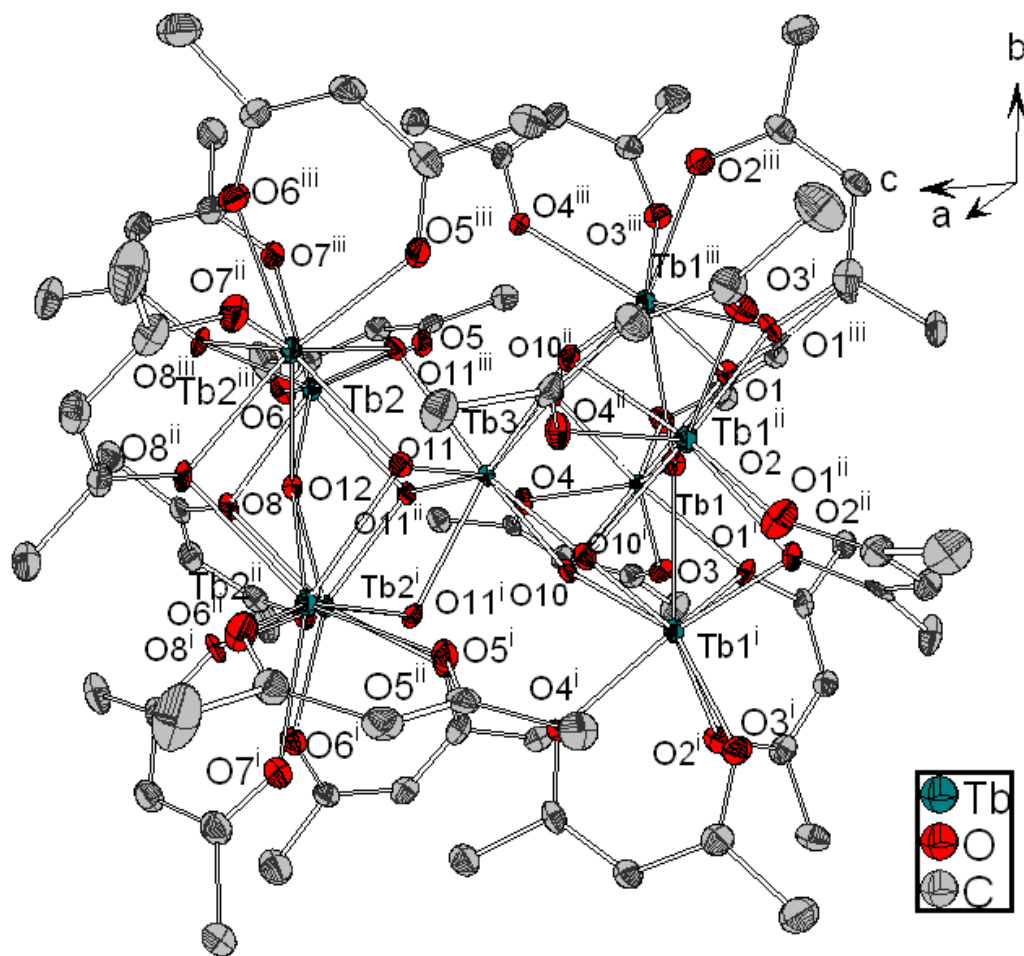

**Compound 3 (Symmetry operation:**

**a  $-y+3/2,x,z$    b  $y,-x+3/2,z$    c  $-x+3/2,-y+3/2,z$ )**
